# Supplementary material for: Frailty predicts surgical complications after kidney transplantation. A propensity score matched study
Source: PubMed Central journal article supplement (PMC7043931; doi:10.1371/journal.pone.0229531), 2020-02-26
Supplement: pone.0229531.s002.pdf [file pone.0229531.s002.pdf]

## Frailty score components<sup>1-3</sup>.

|                                   |                                                                                                                                                                                                                                                                    |                |                                          |                |
|-----------------------------------|--------------------------------------------------------------------------------------------------------------------------------------------------------------------------------------------------------------------------------------------------------------------|----------------|------------------------------------------|----------------|
| <b>1 - Shrinking:</b>             | Self-reported unintentional weight loss in the last year.<br><b>Point earned if:</b> ≥ 10 lb lost in the previous year and/or BMI < 18.5 kg/m <sup>2</sup> .                                                                                                       |                |                                          |                |
| <b>2 - Weakness:</b>              | Using a hand-held dynamometer in the arm without a functioning shunt, performed in triplicate, requesting the individual to exert the greatest possible force.<br><b>Point earned if:</b>                                                                          |                |                                          |                |
|                                   | MEN                                                                                                                                                                                                                                                                |                | WOMEN                                    |                |
|                                   | BMI (kg/m <sup>2</sup> ):                                                                                                                                                                                                                                          | Strength (kg): | BMI (kg/m <sup>2</sup> ):                | Strength (kg): |
|                                   | ≤ 24.0                                                                                                                                                                                                                                                             | ≤ 29.0         | ≤ 23.0                                   | ≤ 17.0         |
| 24.1-26.0                         | ≤ 30.0                                                                                                                                                                                                                                                             | 23.1-26.0      | ≤ 17.3                                   |                |
| 26.1-28.0                         | ≤ 30.0                                                                                                                                                                                                                                                             | 26.1-29.0      | ≤ 18.0                                   |                |
| > 28.0                            | ≤ 32.0                                                                                                                                                                                                                                                             | > 29.0         | ≤ 21.0                                   |                |
| <b>3 - Exhaustion:</b>            | Two questions from the Center for Epidemiological Studies Depression Scale were used. Item seven: "I felt that everything I did was an effort" and item twenty: "I could not get going".<br><b>Point earned if:</b> Answered "yes" to either of the two questions. |                |                                          |                |
| <b>4 - Slow walking speed:</b>    | The time taken to walk 15 ft in a straight line was assessed in triplicate.<br><b>Point earned if:</b>                                                                                                                                                             |                |                                          |                |
|                                   | MEN                                                                                                                                                                                                                                                                |                | WOMEN                                    |                |
|                                   | Height (cm):                                                                                                                                                                                                                                                       | Time (s):      | Height (cm):                             | Time (s):      |
|                                   | ≤ 173                                                                                                                                                                                                                                                              | ≥ 7            | ≤ 159                                    | ≥ 7            |
| > 173                             | ≥ 6                                                                                                                                                                                                                                                                | > 159          | ≥ 6                                      |                |
| <b>5 - Low physical activity:</b> | The Minnesota Leisure Time Physical Activity Questionnaire was used, and the weekly caloric expenditure was calculated for each activity performed.<br><b>Point earned if:</b>                                                                                     |                |                                          |                |
|                                   | MEN                                                                                                                                                                                                                                                                |                | WOMEN                                    |                |
|                                   | Weekly caloric expenditure (kcal): < 383                                                                                                                                                                                                                           |                | Weekly caloric expenditure (kcal): < 270 |                |

## References

1. Fried LP, Tangen CM, Walston J, et al. Frailty in older adults: Evidence for phenotype. *J Gerontol A Biol Sci Med Sci*. 2001;56(4):146-156.
2. Batistoni SS, Neri AL, Cupertino AP. Validity of the Center for Epidemiological Studies Depression Scale among Brazilian elderly. *Rev Saude Publica*. 2007;41(4):598-605.
3. Lustosa LP, Pereira DS, Dias RC, et al. Tradução e adaptação transcultural do Minnesota Leisure Time Activities Questionnaire em idosos. *Geriatr Gerontol*. 2011;5(2):57-65.
