# Supplementary material for: Frailty predicts surgical complications after kidney transplantation. A propensity score matched study
Source: PubMed Central journal article supplement (PMC7043931; doi:10.1371/journal.pone.0229531), 2020-02-26

## S5 Appendix – Distribution of propensity scores after matching.

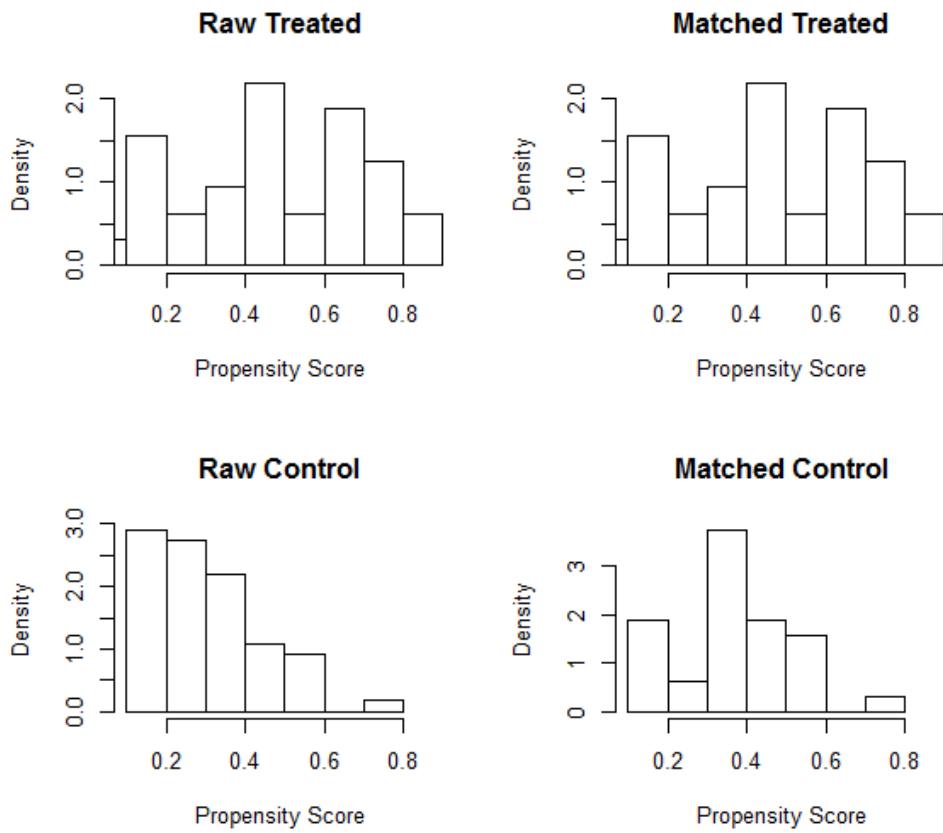

Supplement: pone.0229531.s005.pdf [file pone.0229531.s005.pdf]
